# Supplementary material
Source: PubMed Central journal article supplement (PMC4788344)
Supplement: lido869925.wt1_default.pdf [file lido869925.wt1_default.pdf]

Specification of outcomes for exclusions and for end points (bolded)

| ICD-8                          | ICD-10       | Diagnosis                                               |
|--------------------------------|--------------|---------------------------------------------------------|
| <b>Cardiovascular diseases</b> |              |                                                         |
| 410                            | DI21-22      | Acute myocardial infarction (AMI)                       |
| 411-14                         | DI20, 23-25  | Ischaemic heart disease without AMI                     |
| <b>450</b>                     | <b>DI26</b>  | <b>Pulmonary embolism (PE)</b>                          |
| 430                            | DI60         | Subarachnoid haemorrhage (SAH)                          |
| 431                            | DI61         | Intracerebral haemorrhage (ICH)                         |
|                                | DI62         | Unspecified non traumatic intracranial haemorrhage      |
| 433, 434                       | DI63         | Cerebral infarction                                     |
| 436                            | DI64         | Cerebral apoplexy                                       |
| <b>438</b>                     | <b>DI676</b> | <b>Thrombosis of intracranial vein</b>                  |
|                                | <b>DI801</b> | <b>Thrombophlebitis of femoral vein</b>                 |
| <b>451.08</b>                  | <b>DI802</b> | <b>Deep thrombophlebitis of veins in leg</b>            |
| <b>451.00</b>                  | <b>DI803</b> | <b>Unspecified deep thrombophlebitis in lower limb</b>  |
| <b>453.02</b>                  | <b>DI822</b> | <b>Embolism and thrombosis of caval vein.</b>           |
|                                | <b>DI823</b> | <b>Embolism and thrombosis in renal vein</b>            |
| <b>451.99</b>                  | <b>DI828</b> | <b>Embolism and thrombosis in other specified veins</b> |
| <b>451.99</b>                  | <b>DI829</b> | <b>Embolism and thrombosis in non-specified veins</b>   |
| <b>Cancer diseases</b>         |              |                                                         |
| 174                            | DC50         | Breast cancer                                           |
| 180                            | DC53         | Cervical cancer                                         |
| 182                            | DC54         | Endometrial cancer                                      |
|                                | DC55         | Cancer of womb without specification                    |
| 183.00-09                      | DC56         | Ovarian cancer                                          |
| 183.19                         | DC570        | Tubal cancer                                            |
| 184                            | DC571-9      | Non specified cancer in female genitals                 |
| 153                            | DC180-189    | Colon cancer                                            |
| 154                            | DC190-211    | Rectum cancer                                           |
| 201                            | DC81         | Malignant lymphoma of Hodgkin type                      |
|                                | DC82         | Malignant lymphoma non Hodgkin, follicular type         |

---

|                            |           |                                                    |
|----------------------------|-----------|----------------------------------------------------|
|                            | DC83      | Malignant lymphoma non Hodgkin, diffuse type       |
| 202                        | DC84      | T-cell malignant lymphoma in skin or systemic      |
| 200                        | DC85      | Malignant lymphoma non Hodgkin, non specified      |
|                            | DC88      | Malignant immunoproliferative disease              |
| 203                        | DC90      | Myelomatosis                                       |
| 204                        | DC91      | Lymphatic leukaemia                                |
| 205                        | DC92      | Myeloid leukaemia                                  |
| 206                        | DC93      | Monocyt leukaemia                                  |
|                            | DC94      | Leukaemia other, specified                         |
| 207                        | DC95      | Leukaemia without specification                    |
|                            | DC96      | Non specified cancer in lymphatic or blood tissue  |
| <b>Pregnancy</b>           |           |                                                    |
|                            | DO000-09  | Ectopic pregnancy                                  |
|                            | DO010-19  | Hydatid mole                                       |
|                            | DO020-29  | Missed abortion                                    |
|                            | DO030-39  | Spontaneous abortion                               |
|                            | DO040-49  | Induced abortion 1st trimester                     |
|                            | DO050-59  | Induced abortion, 2nd trimester                    |
|                            | DO600-849 | Delivery                                           |
| <b>Surgical procedures</b> |           |                                                    |
| 610xx                      | LCD00-97  | Hysrrectomy (censoring criteria)                   |
| 60100                      | LAE10/11  | Unilateral oophorectomy                            |
| 60300                      | LAF00/01  | Salpingoophorectomy unilateral                     |
| 60120                      | LAE20/21  | Bilateral oophorectomy (censoring criteria)        |
| 60320                      | LAF10/11  | Salpingoophorectomy bilateral (censoring criteria) |
| 608.00-40                  | LGA       | Female sterilisation (censoring criteria)          |
| <b>Treatment codes</b>     |           |                                                    |
|                            | BJCZ01    | Hormone IUD application                            |

---
