# Supplementary material
Source: PubMed Central journal article supplement (PMC4788344)
Supplement: lido869925.ww1_default.pdf [file lido869925.ww1_default.pdf]

## **Surgery**

Bilateral oophorectomy: KLAE20/12 or KLAF10/11

Two times unilateral oophorectomy: KLAE 10/11 and KLAF 00/01

Hysterectomy: KLCC 10, 11, 20, KLCD00-40

Sterilised: KLGA00-98

## **Coagulation disturbances**

Bleeding disorders: DD680-4

Leiden factor V heterozygote: DD685 A

Leiden factor V homozygote: DD685 B

Prothrombin 20210 heterozygote: DD680-4, DD685 E

Prothrombin 20210 homozygote: DD680-4, DD685 F

Protein C insufficiency: DD686 A

Protein S insufficiency: DD686 B

Anti-thrombin III insufficiency: DD 686 C
