# Supplementary material
Source: PubMed Central journal article supplement (PMC4788344)
Supplement: lido869925.ww3_default.pdf [file lido869925.ww3_default.pdf]

## Appendix 2

*Rate ratio estimates (RR) of venous thromboembolism (VTE) between users of different combined oral contraceptives with 30-40 ug ethinylestradiol (EE) according different steps in exposure line formation*

| 2001-May 2007*<br>COC with             | Women-years<br>n / n | VTE all<br>n / n | Adjust<br>RR <sup>1</sup> | 95% CI |      | p-value |
|----------------------------------------|----------------------|------------------|---------------------------|--------|------|---------|
|                                        |                      |                  |                           | Low    | High |         |
| <b>Raw exposure lines</b>              |                      |                  |                           |        |      |         |
| DRSP vs LNG                            | 207,270 / 157,383    | 187 / 112        | <b>2.18</b>               | 1.72   | 2.77 | <.0001  |
| DRSP vs 3rd gen                        | 207,270 / 607,557    | 187 / 632        | <b>1.11</b>               | 0.94   | 1.32 | 0.199   |
| Desogestrel vs LNG                     | 122,309 / 157,383    | 124 / 112        | <b>1.80</b>               | 1.40   | 2.33 | <.0001  |
| Gestodene vs LNG                       | 485,248 / 157,383    | 508 / 112        | <b>2.00</b>               | 1.63   | 2.46 | <.0001  |
| <b>Gap-corrected exposure lines</b>    |                      |                  |                           |        |      |         |
| DRSP vs LNG all                        | 221,190 / 165,248    | 197 / 118        | <b>2.17</b>               | 1.72   | 2.74 | <.0001  |
| DRSP vs 3rd gen                        | 221,190 / 641,780    | 197 / 660        | <b>1.12</b>               | 0.95   | 1.31 | 0.178   |
| Desogestrel vs LNG                     | 129,609 / 165,248    | 133 / 118        | <b>1.83</b>               | 1.43   | 2.35 | <.0001  |
| Gestodene vs LNG                       | 512,171 / 165,248    | 527 / 118        | <b>1.98</b>               | 1.62   | 2.42 | <.0001  |
| <b>Switch corrected exposure lines</b> |                      |                  |                           |        |      |         |
| DRSP vs LNG                            | 217,372 / 163,856    | 197 / 118        | <b>2.19</b>               | 1.74   | 2.77 | <.0001  |
| DRSP vs 3rd gen                        | 217,372 / 637,084    | 197 / 657        | <b>1.13</b>               | 0.96   | 1.33 | 0.130   |
| Desogestrel vs LNG                     | 128,241 / 163,856    | 133 / 118        | <b>1.84</b>               | 1.43   | 2.35 | <.0001  |
| Gestodene vs LNG                       | 508,843 / 163,856    | 524 / 118        | <b>1.96</b>               | 1.60   | 2.40 | <.0001  |

\*) 2001-May 2007 was chosen due to a media event in June 2007 after which many women switched from COC with drospirenone.

1) Adjust RR: Adjusted for age, year and education.

LNG = COC with levonorgestrel phasic + combined and 30-40 µg EE..

Desogestrel = COC with desogestrel and 30 µg EE.

Gestodene = COC with gestodene and 30 µg EE

DRSP = COC with drospirenone and 30 µg EE.

3<sup>rd</sup> gen = COC with third generation progestogens (desogestrel or gestodene) and 30 µg EE
