# Supplementary material
Source: PubMed Central journal article supplement (PMC4788344)
Supplement: lido869925.ww4_default.pdf [file lido869925.ww4_default.pdf]

### Appendix 3

*Rate ratio estimates (RR) of venous thromboembolism (VTE) between users of different combined oral contraceptives with 30-40 ug ethinylestradiol (EE) in three sub-periods and for the whole period 2001-2009*

| 2001-2009<br>COC with          | Women-years<br>n / n | VTE all<br>n / n | Adjust<br>RR <sup>1</sup> | 95% CI |      | p-value |
|--------------------------------|----------------------|------------------|---------------------------|--------|------|---------|
|                                |                      |                  |                           | Low    | High |         |
| <b>2001-2005</b>               |                      |                  |                           |        |      |         |
| DRSP vs LNG                    | 146,729 / 134,783    | 128/95           | <b>2.16</b>               | 1.65   | 2.83 | <.0001  |
| DRSP vs 3rd gen                | 146,729 / 517,226    | 128/504          | <b>1.15</b>               | 0.95   | 1.40 | 0.1625  |
| Desogestrel vs LNG             | 103,538 / 134,783    | 94/95            | <b>1.64</b>               | 1.24   | 2.19 | 0.0007  |
| Gestodene vs LNG               | 413,687 / 134,783    | 410/95           | <b>1.94</b>               | 1.55   | 2.43 | <.0001  |
| <b>2006-May 2007</b>           |                      |                  |                           |        |      |         |
| DRSP vs LNG                    | 70,642 / 29,073      | 69/23            | <b>2.35</b>               | 1.45   | 3.79 | 0.001   |
| DRSP vs 3 <sup>rd</sup> . gen. | 70,642 / 119,858     | 69/153           | <b>1.09</b>               | 0.82   | 1.46 | 0.545   |
| Desogestrel vs LNG             | 24,702 / 29,073      | 39/23            | <b>2.54</b>               | 1.52   | 4.26 | 0.000   |
| Gestodene vs LNG               | 95,156 / 29,073      | 114/23           | <b>2.04</b>               | 1.30   | 3.20 | 0.002   |
| <b>June 2007-2009</b>          |                      |                  |                           |        |      |         |
| DRSP vs LNG                    | 69,488 / 46,365      | 69/49            | <b>1.62</b>               | 1.12   | 2.34 | 0.011   |
| DRSP vs 3rd gen                | 69,488 / 201,520     | 69/282           | <b>0.91</b>               | 0.70   | 1.18 | 0.475   |
| Desogestrel vs LNG             | 42,008 / 46,365      | 68/49            | <b>1.95</b>               | 1.35   | 2.82 | 0.000   |
| Gestodene vs LNG               | 159,512 / 46,365     | 214/49           | <b>1.74</b>               | 1.27   | 2.37 | 0.001   |
| <b>2001-2009</b>               |                      |                  |                           |        |      |         |
| DRSP vs LNG                    | 286,859 / 210,221    | 266/167          | <b>2.00</b>               | 1.64   | 2.43 | <.0001  |
| DRSP vs 3rd gen                | 286,859 / 838,604    | 266/939          | <b>1.06</b>               | 0.92   | 1.21 | 0.4283  |
| Desogestrel vs LNG             | 170,248 / 210,221    | 201/167          | <b>1.88</b>               | 1.53   | 2.31 | <.0001  |
| Gestodene vs LNG               | 668,355 / 210,221    | 738/167          | <b>1.89</b>               | 1.60   | 2.24 | <.0001  |

1) Adjust RR: Adjusted for age, year and education.

LNG = COC with levonorgestrel phasic + combined and 30-40 µg EE.

Desogestrel = COC with desogestrel and 30 µg EE.

Gestodene = COC with gestodene and 30 µg EE

DRSP = COC with drospirenone and 30 µg EE.

3<sup>rd</sup> gen = COC with third generation progestogens (desogestrel or gestodene) and 30 µg EE
