# Supplementary material
Source: PubMed Central journal article supplement (PMC4788344)
Supplement: lido869925.ww5_default.pdf [file lido869925.ww5_default.pdf]

## Appendix 4

*Rate ratio estimates (RR) of venous thromboembolism (VTE) between users of different combined oral contraceptives with 30-40 µg ethinylestradiol (EE) according to different user categories for the whole period 2001-2009*

| 2001-2009<br>COC with               | VTE all<br>n / n | Adjust<br>RR | 95% CI |      | p-value |
|-------------------------------------|------------------|--------------|--------|------|---------|
|                                     |                  |              | Low    | High |         |
| <b>Start use only</b>               |                  |              |        |      |         |
| DRSP vs LNG                         | 59 / 37          | <b>2.69</b>  | 1.76   | 4.10 | <.0001  |
| DRSP vs 3rd gen                     | 59 / 178         | <b>1.28</b>  | 0.94   | 1.72 | 0.1144  |
| Desogestrel vs LNG                  | 40 / 37          | <b>2.67</b>  | 1.70   | 4.18 | <.0001  |
| Gestodene vs LNG                    | 138 / 37         | <b>1.99</b>  | 1.38   | 2.87 | 0.0002  |
| <b>Start + new use</b>              |                  |              |        |      |         |
| DRSP vs LNG                         | 137 / 84         | <b>2.05</b>  | 1.56   | 2.70 | <.0001  |
| DRSP vs 3rd gen                     | 137 / 472        | <b>1.07</b>  | 0.88   | 1.30 | 0.4831  |
| Desogestrel vs LNG                  | 103 / 84         | <b>2.14</b>  | 1.60   | 2.85 | <.0001  |
| Gestodene vs LNG                    | 369 / 84         | <b>1.86</b>  | 1.47   | 2.36 | <.0001  |
| <b>Start + new + re-started use</b> |                  |              |        |      |         |
| DRSP vs LNG                         | 196 / 144        | <b>1.96</b>  | 1.57   | 2.44 | <.0001  |
| DRSP vs 3rd gen                     | 196 / 780        | <b>1.07</b>  | 0.91   | 1.25 | 0.4268  |
| Desogestrel vs LNG                  | 161 / 144        | <b>1.85</b>  | 1.48   | 2.32 | <.0001  |
| Gestodene vs LNG                    | 619 / 144        | <b>1.83</b>  | 1.53   | 2.20 | <.0001  |
| <b>All categories</b>               |                  |              |        |      |         |
| DRSP vs LNG                         | 266 / 167        | <b>2.00</b>  | 1.64   | 2.43 | <.0001  |
| DRSP vs 3rd gen                     | 266 / 939        | <b>1.06</b>  | 0.92   | 1.21 | 0.4283  |
| Desogestrel vs LNG                  | 201 / 167        | <b>1.88</b>  | 1.53   | 2.31 | <.0001  |
| Gestodene vs LNG                    | 738 / 167        | <b>1.89</b>  | 1.60   | 2.24 | <.0001  |

1) Adjust RR: Adjusted for age, year and education.

LNG = COC with levonorgestrel phasic + combined and 30-40 µg EE..

Desogestrel = COC with desogestrel and 30 µg EE.

Gestodene = COC with gestodene and 30 µg EE

DRSP = COC with drospirenone and 30 µg EE.

3<sup>rd</sup> gen = COC with third generation progestogens (desogestrel or gestodene) and 30 µg EE
